# Supplementary material for: Validation of a diabetes numeracy test in Arabic
Source: PubMed Central journal article supplement (PMC5417435; doi:10.1371/journal.pone.0175442), 2017-05-04
Supplement: pone.0175442.s001.pdf [file pone.0175442.s001.pdf]

| dkt1 | dkt2 | dkt3 | dkt4 | dkt5 | dkt6 | dkt7 | dkt8 | dkt9 |   |
|------|------|------|------|------|------|------|------|------|---|
| 1    | 0    | 0    | 0    | 0    | 0    | 0    | 1    | 0    | 0 |
| 0    | 0    | 0    | 0    | 0    | 0    | 0    | 0    | 1    | 0 |
| 1    | 1    | 1    | 0    | 1    | 1    | 1    | 1    | 1    | 1 |
| 1    | 0    | 0    | 0    | 0    | 0    | 1    | 0    | 0    | 0 |
| 1    | 0    | 0    | 0    | 0    | 0    | 0    | 0    | 0    | 1 |
| 1    | 1    | 0    | 0    | 1    | 0    | 0    | 1    | 1    | 1 |
| 1    | 1    | 1    | 0    | 0    | 0    | 0    | 0    | 1    | 1 |
| 0    | 0    | 0    | 0    | 0    | 1    | 0    | 0    | 0    | 1 |
| 0    | 1    | 0    | 0    | 0    | 0    | 0    | 0    | 1    | 1 |
| 0    | 1    | 0    | 1    | 1    | 1    | 1    | 1    | 1    | 1 |
| 1    | 0    | 0    | 0    | 0    | 0    | 1    | 0    | 0    | 1 |
| 0    | 0    | 0    | 0    | 0    | 0    | 0    | 0    | 1    | 1 |
| 1    | 0    | 1    | 0    | 0    | 1    | 1    | 1    | 0    | 1 |
| 1    | 0    | 0    | 1    | 0    | 0    | 0    | 0    | 0    | 0 |
| 0    | 0    | 0    | 0    | 0    | 1    | 1    | 0    | 1    | 1 |
| 1    | 0    | 0    | 0    | 0    | 0    | 0    | 1    | 0    | 1 |
| 1    | 1    | 1    | 1    | 1    | 1    | 1    | 1    | 0    | 1 |
| 1    | 0    | 0    | 1    | 0    | 0    | 1    | 0    | 0    | 1 |
| 1    | 0    | 0    | 1    | 1    | 1    | 1    | 1    | 1    | 1 |
| 1    | 0    | 1    | 0    | 0    | 0    | 1    | 1    | 1    | 1 |
| 1    | 1    | 0    | 0    | 1    | 1    | 1    | 0    | 1    | 1 |
| 1    | 1    | 0    | 0    | 1    | 0    | 0    | 0    | 0    | 1 |
| 1    | 0    | 0    | 0    | 0    | 1    | 1    | 1    | 1    | 1 |
| 1    | 0    | 0    | 0    | 0    | 1    | 1    | 1    | 1    | 1 |
| 1    | 0    | 0    | 0    | 1    | 1    | 1    | 1    | 0    | 1 |
| 1    | 1    | 0    | 0    | 1    | 1    | 1    | 0    | 0    | 0 |
| 1    | 0    | 0    | 0    | 0    | 0    | 0    | 1    | 0    | 1 |
| 1    | 0    | 0    | 0    | 0    | 0    | 1    | 0    | 1    | 1 |
| 1    | 0    | 0    | 0    | 1    | 0    | 0    | 0    | 0    | 1 |
| 1    | 1    | 0    | 0    | 1    | 0    | 1    | 1    | 1    | 0 |
| 0    | 1    | 0    | 0    | 0    | 0    | 0    | 0    | 0    | 0 |
| 0    | 0    | 0    | 0    | 0    | 1    | 1    | 1    | 0    | 1 |
| 1    | 1    | 0    | 0    | 0    | 0    | 1    | 0    | 0    | 1 |
| 1    | 0    | 0    | 1    | 1    | 1    | 1    | 0    | 1    | 1 |
| 0    | 0    | 0    | 0    | 1    | 1    | 1    | 1    | 0    | 1 |
| 1    | 0    | 0    | 0    | 0    | 1    | 1    | 0    | 0    | 1 |
| 1    | 0    | 0    | 0    | 0    | 0    | 0    | 0    | 0    | 1 |
| 1    | 0    | 0    | 0    | 0    | 0    | 1    | 1    | 1    | 1 |
| 1    | 0    | 0    | 0    | 0    | 1    | 1    | 0    | 1    | 1 |
| 0    | 1    | 0    | 0    | 1    | 1    | 1    | 1    | 1    | 1 |
| 1    | 0    | 1    | 0    | 1    | 1    | 1    | 1    | 1    | 1 |
| 1    | 0    | 0    | 0    | 1    | 1    | 1    | 1    | 1    | 1 |
| 1    | 1    | 1    | 0    | 1    | 0    | 0    | 0    | 1    | 1 |
| 1    | 0    | 1    | 1    | 0    | 1    | 0    | 1    | 1    | 1 |

|   |   |   |   |   |   |   |   |   |
|---|---|---|---|---|---|---|---|---|
| 1 | 0 | 1 | 0 | 1 | 1 | 1 | 0 | 1 |
| 1 | 0 | 0 | 0 | 1 | 0 | 1 | 0 | 1 |
| 1 | 1 | 0 | 0 | 1 | 1 | 0 | 1 | 0 |
| 1 | 0 | 0 | 0 | 1 | 0 | 0 | 0 | 1 |
| 1 | 0 | 1 | 0 | 0 | 1 | 0 | 1 | 1 |
| 1 | 1 | 0 | 1 | 1 | 0 | 1 | 0 | 1 |
| 1 | 0 | 0 | 1 | 0 | 1 | 0 | 0 | 1 |
| 0 | 1 | 0 | 0 | 0 | 1 | 0 | 1 | 1 |
| 1 | 0 | 0 | 0 | 1 | 0 | 1 | 1 | 1 |
| 1 | 0 | 0 | 0 | 1 | 0 | 1 | 0 | 1 |
| 1 | 0 | 0 | 0 | 0 | 0 | 0 | 0 | 1 |
| 1 | 0 | 1 | 0 | 0 | 1 | 1 | 0 | 1 |
| 1 | 1 | 1 | 0 | 1 | 1 | 1 | 1 | 1 |
| 1 | 1 | 0 | 1 | 0 | 1 | 1 | 0 | 1 |
| 0 | 0 | 0 | 0 | 1 | 1 | 1 | 1 | 1 |
| 1 | 0 | 0 | 0 | 0 | 1 | 1 | 0 | 1 |
| 0 | 0 | 0 | 0 | 0 | 0 | 0 | 0 | 1 |
| 1 | 1 | 0 | 1 | 0 | 1 | 1 | 1 | 1 |
| 1 | 0 | 0 | 1 | 1 | 0 | 1 | 0 | 1 |
| 1 | 0 | 0 | 0 | 0 | 1 | 0 | 1 | 1 |
| 0 | 0 | 0 | 1 | 1 | 0 | 0 | 0 | 1 |
| 1 | 1 | 1 | 0 | 0 | 1 | 1 | 1 | 1 |
| 1 | 1 | 0 | 0 | 0 | 0 | 1 | 0 | 1 |
| 0 | 0 | 0 | 0 | 1 | 1 | 0 | 1 | 1 |
| 1 | 1 | 0 | 0 | 0 | 1 | 0 | 0 | 1 |
| 1 | 1 | 0 | 0 | 0 | 1 | 1 | 0 | 1 |
| 0 | 0 | 0 | 0 | 1 | 1 | 0 | 1 | 1 |
| 1 | 0 | 0 | 1 | 1 | 1 | 0 | 1 | 1 |
| 1 | 0 | 0 | 0 | 0 | 0 | 0 | 1 | 1 |
| 1 | 1 | 0 | 0 | 0 | 0 | 1 | 0 | 1 |
| 1 | 0 | 0 | 0 | 1 | 1 | 0 | 0 | 1 |
| 1 | 1 | 0 | 0 | 1 | 1 | 0 | 0 | 1 |
| 1 | 1 | 0 | 1 | 1 | 1 | 0 | 1 | 1 |
| 0 | 0 | 0 | 0 | 0 | 0 | 1 | 0 | 1 |
| 1 | 1 | 0 | 0 | 0 | 0 | 0 | 1 | 1 |
| 1 | 1 | 1 | 1 | 1 | 1 | 0 | 1 | 1 |
| 1 | 0 | 0 | 0 | 1 | 1 | 0 | 0 | 1 |
| 1 | 0 | 0 | 0 | 0 | 1 | 0 | 0 | 1 |
| 0 | 1 | 0 | 0 | 0 | 0 | 0 | 1 | 1 |
| 0 | 1 | 1 | 0 | 1 | 0 | 0 | 1 | 1 |
| 1 | 1 | 0 | 1 | 1 | 1 | 0 | 0 | 1 |
| 1 | 1 | 0 | 0 | 1 | 1 | 0 | 0 | 1 |
| 0 | 0 | 1 | 0 | 1 | 1 | 1 | 0 | 1 |

|   |   |   |   |   |   |   |   |   |
|---|---|---|---|---|---|---|---|---|
| 0 | 1 | 0 | 0 | 1 | 1 | 1 | 0 | 1 |
| 1 | 1 | 0 | 0 | 0 | 0 | 0 | 0 | 1 |
| 1 | 1 | 0 | 1 | 1 | 1 | 1 | 1 | 1 |
| 0 | 1 | 0 | 0 | 1 | 1 | 0 | 0 | 1 |
| 1 | 0 | 0 | 0 | 0 | 1 | 0 | 0 | 1 |
| 0 | 0 | 0 | 0 | 1 | 1 | 0 | 1 | 1 |
| 0 | 1 | 0 | 1 | 1 | 0 | 0 | 0 | 1 |
| 1 | 0 | 0 | 0 | 1 | 0 | 0 | 0 | 0 |
| 1 | 0 | 0 | 0 | 0 | 1 | 0 | 1 | 1 |
| 1 | 1 | 0 | 1 | 1 | 1 | 0 | 1 | 1 |
| 1 | 0 | 0 | 0 | 1 | 1 | 0 | 0 | 1 |
| 1 | 1 | 0 | 0 | 1 | 0 | 1 | 1 | 0 |
| 1 | 0 | 0 | 0 | 1 | 1 | 0 | 1 | 1 |
| 1 | 1 | 0 | 0 | 1 | 1 | 0 | 0 | 1 |
| 0 | 1 | 0 | 0 | 1 | 0 | 0 | 0 | 1 |
| 1 | 0 | 0 | 0 | 0 | 1 | 0 | 1 | 1 |
| 1 | 1 | 0 | 0 | 1 | 0 | 1 | 1 | 1 |
| 1 | 0 | 0 | 0 | 0 | 1 | 0 | 0 | 1 |
| 1 | 0 | 1 | 0 | 0 | 1 | 1 | 1 | 1 |
| 1 | 0 | 0 | 0 | 0 | 0 | 0 | 1 | 1 |
| 1 | 0 | 0 | 0 | 1 | 0 | 1 | 1 | 1 |
| 1 | 1 | 0 | 1 | 0 | 1 | 1 | 1 | 1 |
| 1 | 1 | 0 | 0 | 1 | 0 | 0 | 1 | 1 |
| 1 | 1 | 1 | 1 | 0 | 1 | 1 | 1 | 1 |
| 1 | 0 | 0 | 0 | 1 | 1 | 0 | 0 | 1 |
| 1 | 1 | 0 | 0 | 1 | 1 | 1 | 0 | 1 |
| 1 | 0 | 1 | 0 | 1 | 1 | 1 | 0 | 1 |
| 1 | 0 | 0 | 0 | 1 | 0 | 1 | 1 | 1 |
| 1 | 1 | 1 | 0 | 0 | 0 | 0 | 1 | 1 |
| 1 | 0 | 0 | 0 | 0 | 1 | 0 | 0 | 0 |
| 0 | 0 | 0 | 0 | 1 | 1 | 0 | 0 | 1 |
| 0 | 1 | 0 | 0 | 0 | 0 | 0 | 1 | 1 |
| 1 | 0 | 0 | 0 | 0 | 0 | 0 | 0 | 0 |
| 0 | 0 | 0 | 0 | 1 | 1 | 1 | 0 | 1 |
| 1 | 0 | 0 | 0 | 0 | 0 | 1 | 0 | 1 |
| 1 | 0 | 1 | 1 | 0 | 1 | 0 | 1 | 1 |
| 1 | 0 | 0 | 0 | 1 | 1 | 0 | 1 | 1 |
| 0 | 1 | 0 | 0 | 0 | 1 | 0 | 0 | 1 |
| 0 | 0 | 0 | 1 | 0 | 1 | 0 | 0 | 1 |
| 1 | 0 | 0 | 1 | 1 | 1 | 1 | 1 | 1 |
| 1 | 0 | 0 | 0 | 1 | 1 | 0 | 0 | 1 |
| 1 | 1 | 1 | 1 | 0 | 1 | 1 | 0 | 1 |
| 1 | 0 | 0 | 1 | 1 | 1 | 0 | 1 | 1 |
| 0 | 0 | 0 | 0 | 1 | 1 | 0 | 1 | 1 |
| 1 | 1 | 0 | 1 | 1 | 1 | 0 | 0 | 0 |
| 0 | 1 | 0 | 0 | 1 | 0 | 0 | 0 | 1 |
| 1 | 0 | 0 | 0 | 1 | 0 | 0 | 1 | 1 |

|   |   |   |   |   |   |   |   |   |
|---|---|---|---|---|---|---|---|---|
| 1 | 1 | 1 | 1 | 0 | 1 | 0 | 0 | 1 |
| 1 | 1 | 0 | 0 | 0 | 0 | 1 | 1 | 1 |
| 1 | 1 | 1 | 1 | 0 | 0 | 1 | 1 | 1 |
| 1 | 1 | 0 | 0 | 0 | 0 | 0 | 0 | 0 |
| 1 | 1 | 1 | 1 | 1 | 1 | 1 | 1 | 1 |
| 0 | 0 | 0 | 0 | 1 | 1 | 1 | 1 | 1 |
| 1 | 0 | 0 | 0 | 1 | 0 | 1 | 1 | 1 |
| 1 | 1 | 0 | 0 | 0 | 1 | 0 | 0 | 0 |
| 0 | 0 | 1 | 0 | 1 | 1 | 1 | 1 | 1 |
| 1 | 0 | 0 | 1 | 1 | 1 | 1 | 1 | 1 |
| 0 | 0 | 1 | 0 | 0 | 1 | 1 | 0 | 1 |
| 1 | 1 | 0 | 0 | 1 | 1 | 0 | 0 | 0 |
| 1 | 0 | 0 | 1 | 1 | 1 | 0 | 0 | 1 |
| 1 | 0 | 0 | 0 | 1 | 1 | 1 | 0 | 1 |
| 0 | 0 | 0 | 0 | 0 | 1 | 1 | 0 | 0 |
| 0 | 1 | 1 | 1 | 0 | 1 | 1 | 0 | 0 |
| 0 | 0 | 1 | 0 | 0 | 0 | 0 | 1 | 1 |
| 1 | 1 | 0 | 0 | 1 | 0 | 1 | 0 | 1 |
| 1 | 0 | 0 | 0 | 0 | 1 | 1 | 1 | 0 |
| 1 | 0 | 1 | 0 | 0 | 0 | 0 | 1 | 1 |
| 1 | 0 | 1 | 0 | 1 | 1 | 0 | 0 | 1 |
| 0 | 1 | 0 | 1 | 1 | 0 | 0 | 0 | 0 |
| 1 | 0 | 1 | 0 | 1 | 1 | 0 | 1 | 1 |
| 1 | 0 | 0 | 1 | 0 | 0 | 0 | 0 | 0 |
| 0 | 0 | 0 | 0 | 0 | 1 | 1 | 0 | 1 |
| 0 | 0 | 0 | 0 | 0 | 0 | 0 | 0 | 1 |
| 1 | 0 | 0 | 0 | 0 | 0 | 0 | 0 | 1 |
| 1 | 0 | 0 | 1 | 1 | 1 | 0 | 0 | 1 |
| 0 | 1 | 0 | 0 | 1 | 1 | 1 | 0 | 1 |
| 0 | 1 | 0 | 0 | 0 | 1 | 1 | 0 | 1 |
| 1 | 0 | 0 | 0 | 0 | 1 | 0 | 0 | 0 |
| 1 | 0 | 0 | 1 | 0 | 1 | 1 | 0 | 1 |
| 1 | 0 | 0 | 0 | 0 | 0 | 0 | 1 | 0 |
| 0 | 0 | 0 | 0 | 1 | 0 | 1 | 1 | 1 |



|   |   |   |   |   |   |   |   |   |
|---|---|---|---|---|---|---|---|---|
| 1 | 1 | 1 | 1 | 1 | 1 | 1 | 1 | 1 |
| 1 | 1 | 1 | 1 | 1 | 1 | 1 | 1 | 1 |
| 1 | 1 | 1 | 1 | 1 | 1 | 0 | 0 | 0 |
| 1 | 1 | 1 | 1 | 1 | 0 | 1 | 1 | 0 |
| 0 | 1 | 1 | 1 | 1 | 0 | 1 | 0 | 0 |
| 1 | 1 | 1 | 1 | 1 | 1 | 1 | 0 | 1 |
| 1 | 1 | 1 | 0 | 1 | 0 | 1 | 0 | 1 |
| 1 | 1 | 1 | 0 | 1 | 1 | 1 | 1 | 0 |
| 1 | 1 | 1 | 1 | 1 | 1 | 1 | 1 | 1 |
| 1 | 1 | 1 | 1 | 1 | 1 | 1 | 0 | 1 |
| 0 | 1 | 0 | 1 | 1 | 0 | 0 | 1 | 0 |
| 0 | 0 | 1 | 1 | 1 | 0 | 0 | 0 | 0 |
| 1 | 1 | 1 | 1 | 1 | 0 | 1 | 1 | 0 |
| 1 | 1 | 1 | 1 | 1 | 1 | 1 | 1 | 1 |
| 1 | 1 | 1 | 1 | 1 | 1 | 1 | 1 | 1 |
| 1 | 1 | 1 | 1 | 1 | 1 | 1 | 1 | 1 |
| 1 | 0 | 0 | 0 | 0 | 1 | 0 | 1 | 0 |
| 1 | 1 | 1 | 1 | 1 | 1 | 1 | 0 | 1 |
| 1 | 1 | 1 | 0 | 1 | 1 | 1 | 0 | 1 |
| 1 | 1 | 1 | 1 | 0 | 1 | 1 | 1 | 0 |
| 1 | 1 | 1 | 1 | 1 | 0 | 1 | 1 | 1 |
| 0 | 1 | 0 | 1 | 0 | 0 | 0 | 1 | 1 |
| 1 | 1 | 1 | 1 | 1 | 1 | 1 | 1 | 1 |
| 1 | 1 | 1 | 1 | 1 | 0 | 0 | 1 | 1 |
| 1 | 1 | 1 | 1 | 1 | 1 | 1 | 0 | 0 |
| 1 | 1 | 1 | 1 | 1 | 0 | 1 | 0 | 0 |
| 1 | 0 | 1 | 1 | 1 | 1 | 1 | 0 | 0 |
| 1 | 1 | 1 | 1 | 1 | 1 | 1 | 0 | 1 |
| 1 | 1 | 1 | 1 | 1 | 0 | 1 | 0 | 1 |
| 1 | 1 | 1 | 1 | 1 | 0 | 1 | 1 | 0 |
| 1 | 1 | 1 | 1 | 1 | 1 | 1 | 0 | 1 |
| 1 | 1 | 0 | 0 | 0 | 0 | 1 | 1 | 1 |
| 1 | 1 | 1 | 1 | 1 | 1 | 1 | 1 | 0 |
| 1 | 1 | 1 | 1 | 0 | 0 | 0 | 1 | 1 |
| 0 | 1 | 1 | 0 | 1 | 0 | 1 | 0 | 0 |
| 1 | 1 | 1 | 1 | 1 | 1 | 1 | 1 | 1 |
| 1 | 1 | 1 | 0 | 1 | 1 | 1 | 1 | 1 |
| 1 | 1 | 1 | 1 | 1 | 0 | 1 | 1 | 0 |
| 1 | 1 | 1 | 1 | 1 | 1 | 1 | 0 | 0 |
| 1 | 1 | 1 | 0 | 0 | 0 | 1 | 1 | 1 |
| 1 | 1 | 1 | 1 | 1 | 1 | 1 | 0 | 1 |
| 1 | 1 | 1 | 1 | 1 | 1 | 1 | 0 | 0 |
| 1 | 1 | 1 | 1 | 1 | 0 | 0 | 1 | 0 |
| 1 | 0 | 1 | 0 | 1 | 0 | 1 | 0 | 0 |
| 1 | 1 | 1 | 1 | 1 | 1 | 0 | 1 | 1 |
| 0 | 0 | 1 | 1 | 1 | 1 | 0 | 0 | 0 |

|   |   |   |   |   |   |   |   |   |
|---|---|---|---|---|---|---|---|---|
| 1 | 1 | 1 | 1 | 1 | 1 | 1 | 1 | 0 |
| 1 | 1 | 1 | 1 | 1 | 1 | 1 | 1 | 0 |
| 0 | 1 | 1 | 1 | 1 | 0 | 1 | 1 | 0 |
| 1 | 1 | 1 | 1 | 1 | 1 | 1 | 1 | 0 |
| 1 | 1 | 0 | 1 | 1 | 1 | 1 | 1 | 0 |
| 0 | 1 | 1 | 1 | 1 | 0 | 1 | 1 | 1 |
| 1 | 1 | 0 | 0 | 1 | 1 | 1 | 1 | 1 |
| 1 | 0 | 1 | 1 | 1 | 1 | 1 | 0 | 0 |
| 1 | 1 | 1 | 1 | 1 | 1 | 1 | 1 | 0 |
| 1 | 0 | 1 | 1 | 0 | 0 | 0 | 0 | 0 |
| 1 | 1 | 0 | 1 | 1 | 0 | 1 | 0 | 0 |
| 1 | 1 | 1 | 0 | 1 | 1 | 1 | 1 | 0 |
| 1 | 1 | 1 | 1 | 1 | 0 | 0 | 0 | 1 |
| 1 | 1 | 1 | 1 | 1 | 1 | 1 | 1 | 0 |
| 1 | 1 | 1 | 1 | 1 | 1 | 1 | 0 | 1 |
| 1 | 0 | 1 | 1 | 1 | 0 | 1 | 0 | 0 |
| 1 | 0 | 1 | 1 | 0 | 0 | 0 | 0 | 0 |
| 0 | 1 | 1 | 0 | 0 | 0 | 1 | 0 | 1 |
| 1 | 0 | 1 | 1 | 1 | 1 | 1 | 1 | 1 |
| 1 | 1 | 1 | 1 | 1 | 1 | 1 | 1 | 1 |
| 1 | 1 | 1 | 1 | 1 | 1 | 1 | 1 | 1 |
| 1 | 1 | 1 | 1 | 1 | 0 | 1 | 1 | 1 |
| 1 | 1 | 0 | 0 | 0 | 0 | 1 | 0 | 0 |
| 1 | 1 | 1 | 1 | 1 | 1 | 1 | 1 | 1 |
| 1 | 1 | 0 | 0 | 0 | 1 | 1 | 1 | 1 |
| 1 | 1 | 1 | 1 | 1 | 1 | 1 | 0 | 1 |
| 1 | 1 | 1 | 1 | 1 | 1 | 1 | 1 | 1 |
| 1 | 1 | 1 | 1 | 1 | 0 | 1 | 0 | 1 |
| 1 | 1 | 0 | 1 | 1 | 0 | 1 | 1 | 1 |
| 1 | 1 | 1 | 1 | 1 | 1 | 1 | 1 | 0 |
| 1 | 1 | 0 | 0 | 1 | 1 | 1 | 1 | 1 |
| 1 | 1 | 0 | 1 | 1 | 1 | 1 | 1 | 1 |
| 1 | 1 | 1 | 1 | 1 | 1 | 1 | 1 | 1 |
| 1 | 1 | 1 | 1 | 1 | 1 | 1 | 1 | 0 |
| 1 | 1 | 1 | 0 | 1 | 1 | 1 | 0 | 1 |
| 1 | 1 | 1 | 1 | 1 | 1 | 0 | 0 | 0 |
| 1 | 1 | 1 | 1 | 1 | 0 | 1 | 0 | 1 |
| 1 | 1 | 1 | 1 | 1 | 1 | 1 | 1 | 1 |
| 0 | 0 | 1 | 1 | 0 |   | 0 | 1 | 1 |
| 1 | 1 | 1 | 1 | 1 | 1 | 1 | 1 | 1 |
| 1 | 1 | 1 | 0 | 1 | 1 | 1 | 0 | 1 |
| 1 | 1 | 1 | 1 | 1 | 0 | 0 | 0 | 0 |
| 0 | 1 | 1 | 1 | 1 | 0 | 1 | 0 | 1 |
| 1 | 1 | 1 | 0 | 1 | 1 | 1 | 0 | 1 |
| 0 | 1 | 0 | 1 | 0 | 1 | 0 | 1 | 1 |

|   |   |   |   |   |   |   |   |   |
|---|---|---|---|---|---|---|---|---|
| 1 | 1 | 1 | 1 | 1 | 1 | 0 | 1 | 1 |
| 1 | 1 | 0 | 1 | 1 | 0 | 1 | 1 | 1 |
| 1 | 1 | 1 | 1 | 1 | 0 | 1 | 0 | 1 |
| 1 | 1 | 0 | 1 | 1 | 0 | 1 | 0 | 1 |
| 1 | 1 | 1 | 1 | 1 | 1 | 1 | 1 | 1 |
| 1 | 1 | 1 | 0 | 1 | 1 | 0 | 0 | 1 |
| 0 | 0 | 1 | 0 | 1 | 1 | 1 | 0 | 1 |
| 1 | 1 | 1 | 1 | 1 | 0 | 1 | 1 | 0 |
| 1 | 1 | 1 | 1 | 1 | 1 | 1 | 1 | 1 |
| 1 | 1 | 1 | 1 | 1 | 1 | 1 | 0 | 1 |
| 0 | 0 | 1 | 1 | 1 | 1 | 1 | 1 | 1 |
| 1 | 1 | 0 | 0 | 0 | 0 | 1 | 0 | 0 |
| 1 | 1 | 1 | 1 | 1 | 1 | 1 | 0 | 1 |
| 1 | 1 | 1 | 1 | 1 | 1 | 1 | 0 | 1 |
| 0 | 1 | 1 | 1 | 1 | 0 | 1 | 0 | 1 |
| 1 | 1 | 1 | 1 | 1 | 1 | 1 | 1 | 1 |
| 1 | 0 | 1 | 1 | 1 | 0 | 1 | 0 | 1 |
| 0 | 1 | 1 | 0 | 1 | 0 | 0 | 1 | 1 |
| 1 | 0 | 0 | 0 | 0 | 0 | 0 | 0 | 1 |
| 0 | 1 | 1 | 1 | 1 | 1 | 1 | 1 | 0 |
| 1 | 1 | 1 | 1 | 1 | 1 | 0 | 0 | 1 |
| 1 | 1 | 1 | 1 | 1 | 0 | 1 | 1 | 1 |
| 1 | 1 | 1 | 1 | 1 | 1 | 1 | 1 | 1 |
| 1 | 1 | 1 | 1 | 1 | 1 | 1 | 1 | 1 |
| 1 | 1 | 1 | 0 | 1 | 1 | 1 | 1 | 1 |
| 1 | 1 | 0 | 0 | 1 | 0 | 0 | 0 | 1 |
| 1 | 0 | 1 | 1 | 0 | 0 | 1 | 0 | 1 |
| 1 | 1 | 1 | 1 | 1 | 1 | 1 | 0 | 1 |
| 1 | 1 | 1 | 1 | 0 | 0 | 0 | 0 | 1 |
| 1 | 1 | 1 | 1 | 1 | 0 | 1 | 1 | 1 |
| 1 | 1 | 0 | 0 | 0 | 1 | 1 | 0 | 1 |
| 0 | 1 | 1 | 0 | 0 | 0 | 0 | 1 | 0 |
| 0 | 1 | 1 | 0 | 1 | 0 | 1 | 0 | 1 |
| 1 | 1 | 0 | 1 | 1 | 1 | 1 | 0 | 0 |
| 1 | 1 | 1 | 1 | 1 | 0 | 1 | 0 | 0 |



| dkt19 | dkt20 | dkt21 | dkt22 | dkt23 | age | gender | education | budget |   |
|-------|-------|-------|-------|-------|-----|--------|-----------|--------|---|
| 1     | 1     | 1     | 1     | 0     | 0   | 23     | 1         | 2      | 1 |
| 1     | 1     | 1     | 1     | 1     | 1   | 17     | 2         | 2      | 4 |
| 1     | 1     | 1     | 1     | 1     | 1   | 22     | 1         | 3      | 3 |
| 1     | 1     | 1     | 1     | 1     | 1   | 19     | 1         | 3      | 2 |
| 1     | 1     | 1     | 1     | 1     | 1   | 20     | 1         | 2      | 2 |
| 1     | 1     | 1     | 1     | 1     | 1   | 28     | 1         | 3      | 3 |
| 1     | 1     | 1     | 1     | 1     | 0   | 18     | 2         | 2      | 1 |
| 1     | 1     | 1     | 1     | 1     | 1   | 23     | 2         | 2      | 1 |
| 1     | 1     | 1     | 1     | 0     | 0   | 25     | 2         | 3      | 1 |
| 1     | 1     | 1     | 1     | 1     | 1   | 28     | 2         | 3      | 2 |
| 1     | 1     | 1     | 1     | 1     | 0   | 16     | 2         | 2      | 3 |
| 1     | 1     | 1     | 1     | 1     | 1   | 16     | 1         | 2      | 1 |
| 1     | 1     | 1     | 1     | 0     | 1   | 30     | 2         | 1      | 1 |
| 1     | 0     | 1     | 0     | 1     | 1   | 20     | 2         | 3      | 2 |
| 1     | 1     | 1     | 1     | 1     | 1   | 20     | 2         | 3      | 5 |
| 1     | 1     | 1     | 1     | 1     | 1   | 29     | 2         | 2      |   |
| 1     | 1     | 1     | 1     | 1     | 1   | 20     | 2         | 2      | 2 |
| 1     | 1     | 0     | 1     | 1     | 1   | 20     | 2         | 2      | 2 |
| 1     | 1     | 1     | 1     | 1     | 1   | 30     | 2         | 2      | 2 |
| 1     | 1     | 1     | 1     | 1     | 1   | 21     | 2         | 3      | 2 |
| 1     | 1     | 1     | 1     | 1     | 1   | 17     | 2         | 1      | 3 |
| 1     | 1     | 1     | 1     | 1     | 0   | 21     | 2         | 3      | 2 |
| 1     | 1     | 1     | 1     | 1     | 1   | 16     | 2         | 2      | 5 |
| 1     | 1     | 1     | 1     | 0     | 0   | 38     | 2         | 3      | 1 |
| 0     | 0     | 1     | 1     | 1     | 0   | 35     | 2         | 1      | 1 |
| 1     | 1     | 1     | 1     | 1     | 1   | 19     | 1         | 3      | 1 |
| 0     | 0     | 0     | 0     | 0     | 0   | 23     | 2         | 3      | 1 |
| 1     | 1     | 1     | 1     | 1     | 1   | 19     | 2         | 2      | 2 |
| 0     | 0     | 0     | 0     | 1     | 0   | 19     | 2         | 3      | 1 |
| 1     | 1     | 1     | 1     | 1     | 1   | 19     | 2         | 2      | 2 |
| 1     | 1     | 1     | 1     | 1     | 1   | 27     | 2         | 2      | 1 |
| 1     | 1     | 1     | 1     | 1     | 1   | 18     | 2         | 2      | 1 |
| 0     | 0     | 1     | 1     | 1     | 0   | 18     | 1         | 2      |   |
| 1     | 1     | 1     | 1     | 1     | 1   | 20     | 2         | 3      | 2 |
| 1     | 1     | 1     | 1     | 0     | 1   | 22     | 2         | 3      | 2 |
| 1     | 1     | 1     | 1     | 1     | 1   | 46     | 2         | 1      | 2 |
| 1     | 1     | 1     | 1     | 1     | 1   | 15     | 2         | 1      | 5 |
| 1     | 1     | 1     | 1     | 1     | 1   | 25     | 2         | 2      | 1 |
| 1     | 1     | 1     | 1     | 1     | 1   | 24     | 2         | 1      | 1 |
| 1     | 1     | 1     | 1     | 1     | 0   | 37     | 2         | 1      | 2 |
| 1     | 0     | 1     | 0     | 0     | 0   | 20     | 2         | 2      | 1 |
| 1     | 1     | 1     | 1     | 1     | 1   | 18     | 2         | 2      | 2 |
| 1     | 1     | 1     | 1     | 1     | 0   | 29     | 2         | 3      | 2 |
| 1     | 1     | 1     | 1     | 1     | 0   | 19     | 2         | 3      | 5 |
| 1     | 1     | 1     | 1     | 1     | 1   | 30     | 2         | 2      | 1 |
| 1     | 1     | 1     | 1     | 1     | 1   | 25     | 2         | 2      | 3 |

|   |   |   |   |   |    |   |   |   |
|---|---|---|---|---|----|---|---|---|
| 1 | 1 | 1 | 1 | 1 | 21 | 2 | 3 | 1 |
| 1 | 1 | 1 | 1 | 1 | 21 | 2 | 3 | 2 |
| 1 | 1 | 1 | 0 | 1 | 23 | 2 | 3 | 2 |
| 1 | 1 | 1 | 1 | 1 | 16 | 2 | 2 | 1 |
| 1 | 1 | 1 | 1 | 1 | 25 | 1 | 2 | 1 |
| 1 | 1 | 1 | 1 | 1 | 50 | 2 | 3 | 1 |
| 1 | 1 | 1 | 1 | 1 | 60 | 1 | 1 | 4 |
| 1 | 1 | 1 | 1 | 0 | 20 | 2 | 2 | 1 |
| 1 | 1 | 1 | 1 | 1 | 16 | 2 | 2 | 4 |
| 1 | 1 | 1 | 1 | 1 | 27 | 2 | 3 | 2 |
| 1 | 1 | 1 | 1 | 1 | 17 | 2 | 2 | 3 |
| 1 | 1 | 1 | 0 | 1 | 18 | 2 | 3 | 1 |
| 1 | 0 | 1 | 1 | 0 | 43 | 2 | 1 | 2 |
| 1 | 1 | 1 | 1 | 1 | 21 | 2 | 3 | 3 |
| 1 | 1 | 1 | 1 | 1 | 40 | 2 | 3 | 3 |
| 1 | 1 | 1 | 1 | 1 | 35 | 2 | 3 | 3 |
| 1 | 1 | 1 | 1 | 0 | 23 | 2 | 2 | 3 |
| 1 | 1 | 1 | 0 | 1 | 20 | 2 | 3 |   |
| 1 | 1 | 1 | 1 | 1 | 17 | 1 | 2 | 4 |
| 1 | 1 | 1 | 1 | 1 | 18 | 2 | 2 | 1 |
| 1 | 1 | 1 | 1 | 1 | 20 | 2 | 3 | 3 |
| 1 | 0 | 0 | 0 | 0 | 27 | 2 | 3 | 1 |
| 1 | 1 | 1 | 1 | 0 | 34 | 2 | 3 | 3 |
| 1 | 1 | 1 | 1 | 0 | 19 | 2 | 3 | 1 |
| 1 | 1 | 1 | 0 | 0 | 19 | 2 | 3 | 2 |
| 1 | 1 | 1 | 1 | 1 | 28 | 2 | 2 | 2 |
| 1 | 1 | 1 | 1 | 1 | 22 | 2 | 2 | 1 |
| 0 | 1 | 1 | 1 | 1 | 20 | 2 | 2 |   |
| 1 | 1 | 1 | 1 | 1 | 19 | 1 | 3 | 1 |
| 1 | 1 | 1 | 1 | 0 | 25 | 2 | 3 | 1 |
| 1 | 0 | 1 | 1 | 1 | 25 | 2 | 2 | 1 |
| 1 | 1 | 1 | 1 | 1 | 27 | 2 | 3 | 2 |
| 1 | 0 | 1 | 1 | 0 | 16 | 2 | 2 | 3 |
| 1 | 1 | 1 | 1 | 1 | 22 | 2 | 3 | 1 |
| 1 | 1 | 1 | 1 | 1 | 52 | 2 | 2 | 3 |
| 1 | 1 | 1 | 1 | 0 | 20 | 1 | 2 | 1 |
| 1 | 1 | 1 | 1 | 0 | 44 | 2 | 3 | 4 |
| 1 | 1 | 1 | 1 | 1 | 23 | 2 | 3 | 1 |
| 0 | 1 | 1 | 1 | 1 | 26 | 2 | 3 | 1 |
| 1 | 1 | 1 | 1 | 1 | 26 | 2 | 2 | 3 |
| 1 | 1 | 1 | 1 | 0 | 25 | 2 | 3 | 2 |
| 1 | 1 | 1 | 0 | 1 | 22 | 2 | 3 | 2 |
| 1 | 0 | 1 | 1 | 1 | 50 | 2 | 1 |   |
| 1 | 1 | 1 | 1 | 1 | 26 | 2 | 3 |   |
| 1 | 1 | 1 | 1 | 1 | 18 | 2 | 3 | 3 |
| 1 | 1 | 1 | 1 | 1 | 33 | 2 | 3 | 2 |
| 1 | 1 | 1 | 1 | 1 | 44 | 2 | 1 | 1 |

|   |   |   |   |   |    |   |   |   |
|---|---|---|---|---|----|---|---|---|
| 1 | 1 | 1 | 1 | 1 | 22 | 2 | 2 | 1 |
| 1 | 1 | 1 | 1 | 1 | 17 | 2 | 2 | 2 |
| 1 | 1 | 1 | 1 | 1 | 45 | 2 | 3 | 4 |
| 1 | 1 | 1 | 1 | 1 | 25 | 2 | 2 | 3 |
| 1 | 1 | 1 | 1 | 1 | 28 | 2 | 3 | 2 |
| 1 | 1 | 1 | 1 | 1 | 17 | 2 | 2 | 2 |
| 1 | 1 | 1 | 1 | 1 | 22 | 2 | 3 | 3 |
| 1 | 1 | 1 | 0 | 1 | 25 | 2 | 3 | 3 |
| 1 | 1 | 1 | 1 | 1 | 16 | 1 | 2 | 4 |
| 1 | 1 | 1 | 1 | 1 | 50 | 2 | 3 | 2 |
| 1 | 1 | 1 | 1 | 1 | 16 | 1 | 1 | 1 |
| 1 | 1 | 1 | 1 | 0 | 17 | 1 | 2 | 1 |
| 1 | 1 | 1 | 1 | 1 | 42 | 2 | 3 | 1 |
| 1 | 1 | 1 | 1 | 1 | 24 | 2 | 2 | 1 |
| 1 | 1 | 1 | 1 | 1 | 24 | 2 | 2 | 1 |
| 1 | 1 | 1 | 1 | 1 | 26 | 2 | 3 | 2 |
| 1 | 1 | 1 | 1 | 1 | 20 | 2 | 3 |   |
| 1 | 1 | 1 | 0 | 0 | 19 | 1 | 2 | 1 |
| 1 | 1 | 1 | 0 | 1 | 17 | 2 | 2 |   |
| 1 | 1 | 1 | 1 | 0 | 16 | 1 | 2 | 2 |
| 1 | 1 | 1 | 1 | 1 | 16 | 2 | 2 | 5 |
| 1 | 1 | 1 | 1 | 1 | 18 | 2 | 3 | 5 |
| 1 | 1 | 1 | 1 | 1 | 16 | 2 | 1 | 3 |
| 1 | 1 | 1 | 1 | 1 | 20 | 2 | 3 | 4 |
| 1 | 1 | 1 | 1 | 1 | 18 | 2 | 2 | 2 |
| 1 | 1 | 1 | 1 | 1 | 20 | 1 | 3 | 3 |
| 1 | 1 | 1 | 1 | 1 | 22 | 2 | 3 | 1 |
| 1 | 1 | 1 | 1 | 1 | 26 | 2 | 3 | 5 |
| 1 | 1 | 1 | 1 | 1 | 25 | 2 | 3 |   |
| 1 | 1 | 1 | 1 | 0 | 21 | 2 | 3 | 1 |
| 1 | 1 | 1 | 1 | 1 | 23 | 2 | 2 | 2 |
| 1 | 1 | 1 | 1 | 0 | 18 | 2 | 2 | 1 |
| 1 | 1 | 1 | 1 | 1 | 18 | 2 |   | 4 |
| 1 | 1 | 1 | 1 | 1 | 22 | 2 | 3 | 1 |
| 1 | 1 | 1 | 1 | 1 | 40 | 2 | 3 | 3 |
| 1 | 1 | 1 | 1 | 1 | 49 | 2 | 1 | 1 |
| 1 | 1 | 1 | 1 | 0 | 35 | 2 | 1 | 1 |
| 0 | 0 | 0 | 1 | 0 | 29 | 2 | 2 | 2 |
| 1 | 1 | 1 | 1 | 1 | 16 | 2 | 2 |   |
| 1 | 1 | 1 | 1 | 1 | 22 | 2 | 3 | 4 |
| 0 | 1 | 0 | 0 | 1 | 18 | 2 | 2 |   |
| 1 | 1 | 1 | 1 | 1 | 54 | 2 | 3 | 5 |
| 1 | 1 | 1 | 1 | 1 | 50 | 2 | 2 | 2 |
| 1 | 1 | 1 | 1 | 0 | 19 | 2 | 3 | 1 |
| 1 | 1 | 1 | 1 | 0 | 43 | 1 | 3 | 5 |
| 1 | 1 | 1 | 1 | 1 | 15 | 2 | 2 | 3 |
| 1 | 1 | 1 | 1 | 1 | 16 | 1 | 1 | 3 |

|   |   |   |   |   |    |   |   |   |
|---|---|---|---|---|----|---|---|---|
| 1 | 1 | 1 | 1 | 1 | 34 | 2 | 2 | 1 |
| 1 | 1 | 1 | 1 | 1 | 28 | 2 | 3 | 3 |
| 1 | 1 | 1 | 1 | 1 | 28 | 2 | 1 | 2 |
| 1 | 1 | 1 | 1 | 1 | 17 | 1 | 2 | 2 |
| 1 | 1 | 1 | 1 | 1 | 25 | 2 | 3 | 2 |
| 1 | 1 | 1 | 1 | 1 | 16 | 1 | 2 | 3 |
| 1 | 1 | 1 | 1 | 1 | 19 | 2 | 2 | 2 |
| 1 | 1 | 1 | 1 | 1 | 57 | 2 | 3 | 5 |
| 1 | 1 | 1 | 1 | 1 | 16 | 1 | 2 | 5 |
| 1 | 1 | 1 | 1 | 1 | 21 | 2 | 3 | 5 |
| 1 | 1 | 1 | 1 | 1 | 18 | 1 | 2 | 1 |
| 1 | 1 | 0 | 1 | 1 | 14 | 1 | 2 |   |
| 1 | 1 | 1 | 1 | 1 | 21 | 2 | 3 | 1 |
| 1 | 1 | 1 | 1 | 1 | 22 | 2 | 3 | 1 |
| 1 | 0 | 1 | 0 | 0 | 21 | 2 | 3 | 2 |
| 0 | 0 | 1 | 1 | 1 | 16 | 2 | 2 | 2 |
| 1 | 1 | 1 | 1 | 1 | 18 | 2 | 3 |   |
| 1 | 1 | 1 | 1 | 1 | 25 | 1 | 2 | 2 |
| 0 | 1 | 1 | 1 | 1 | 19 | 1 | 2 |   |
| 1 | 1 | 1 | 1 | 1 | 34 | 1 | 3 | 3 |
| 1 | 1 | 1 | 1 | 1 | 31 | 1 | 3 | 3 |
| 1 | 1 | 1 | 1 | 1 | 20 | 2 | 3 | 4 |
| 1 | 1 | 1 | 1 | 1 | 16 | 2 | 1 |   |
| 1 | 1 | 1 | 1 | 1 | 22 | 1 | 2 | 2 |
| 1 | 1 | 1 | 1 | 1 | 20 | 2 | 2 | 2 |
| 1 | 0 | 1 | 0 | 0 | 29 | 2 | 2 | 1 |
| 1 | 0 | 1 | 0 | 1 | 25 | 2 | 1 | 2 |
| 1 | 0 | 0 | 1 | 1 | 28 | 1 | 2 | 2 |
| 1 | 1 | 1 | 1 | 1 | 21 | 2 | 2 |   |
| 1 | 1 | 1 | 1 | 1 | 20 | 1 | 3 | 1 |
| 1 | 1 | 1 | 1 | 0 | 27 | 2 | 3 | 1 |
| 1 | 1 | 1 | 0 | 0 | 23 | 1 | 3 | 2 |
| 0 | 1 | 0 | 0 | 0 | 25 | 1 | 2 | 2 |
| 1 | 1 | 1 | 1 | 1 | 22 | 2 | 3 | 2 |
| 0 | 0 | 0 | 0 | 0 | 20 | 2 | 2 | 2 |
| 0 | 0 | 1 | 1 | 1 | 24 | 1 | 3 | 1 |

| dmduration | txtype | hba1c | none | cvd | nephropatl | eyeproblem | neuropathy | others |
|------------|--------|-------|------|-----|------------|------------|------------|--------|
| 2          | 4      | 3     | 1    | 0   | 0          | 0          | 0          | 0      |
| 2          | 4      | 3     | 1    | 0   | 0          | 0          | 0          | 0      |
| 1          | 4      | 2     | 1    | 0   | 0          | 0          | 0          | 0      |
| 2          | 4      | 3     | 1    | 0   | 0          | 0          | 0          | 0      |
| 2          | 4      | 3     | 1    | 0   | 0          | 0          | 0          | 0      |
| 2          | 4      | 2     | 1    | 0   | 0          | 0          | 0          | 0      |
| 2          | 4      | 3     | 1    | 0   | 0          | 0          | 0          | 0      |
| 2          | 4      | 3     | 1    | 0   | 0          | 0          | 0          | 0      |
| 1          | 4      | 2     | 1    | 0   | 0          | 0          | 0          | 0      |
| 3          | 4      | 2     | 1    | 0   | 0          | 0          | 0          | 0      |
| 1          | 4      | 3     | 1    | 0   | 0          | 0          | 0          | 0      |
| 1          | 4      | 3     | 1    | 0   | 0          | 0          | 0          | 0      |
| 2          | 4      | 2     | 1    | 0   | 0          | 0          | 0          | 0      |
| 2          | 4      | 3     | 1    | 0   | 0          | 0          | 0          | 0      |
| 2          | 4      | 2     | 1    | 0   | 0          | 0          | 0          | 0      |
| 3          | 4      | 3     | 0    | 1   | 0          | 0          | 0          | 1      |
| 2          | 4      | 2     | 1    | 0   | 0          | 0          | 0          | 0      |
| 2          | 4      | 3     | 0    | 0   | 0          | 1          | 0          | 0      |
| 1          | 4      | 2     | 1    | 0   | 0          | 0          | 0          | 0      |
| 1          | 4      | 2     | 1    | 0   | 0          | 0          | 0          | 0      |
| 1          | 4      | 3     | 1    | 0   | 0          | 0          | 0          | 0      |
| 1          | 4      | 3     | 1    | 0   | 0          | 0          | 0          | 0      |
| 2          | 4      | 3     | 1    | 0   | 0          | 0          | 0          | 0      |
| 1          | 4      | 1     | 1    | 0   | 0          | 0          | 0          | 0      |
| 2          | 3      | 3     | 0    | 0   | 0          | 1          | 0          | 1      |
| 2          | 4      | 2     | 1    | 0   | 0          | 0          | 0          | 0      |
| 1          | 4      | 2     | 1    | 0   | 0          | 0          | 0          | 0      |
| 1          | 4      | 3     | 0    | 0   | 1          | 0          | 0          | 1      |
| 1          | 4      | 3     | 1    | 0   | 0          | 0          | 0          | 0      |
| 2          | 4      | 3     | 1    | 0   | 0          | 0          | 0          | 0      |
| 2          | 4      | 2     | 1    | 0   | 0          | 0          | 0          | 0      |
| 2          | 4      | 1     | 0    | 0   | 0          | 1          | 0          | 0      |
| 2          | 4      | 3     | 1    | 0   | 0          | 0          | 0          | 0      |
| 2          | 4      | 3     | 1    | 0   | 0          | 0          | 0          | 0      |
| 2          | 4      | 3     | 1    | 0   | 0          | 0          | 0          | 0      |
| 2          | 3      | 3     | 0    | 0   | 0          | 1          | 0          | 1      |
| 2          | 4      | 3     | 1    | 0   | 0          | 0          | 0          | 0      |
| 2          | 4      | 3     | 0    | 0   | 0          | 0          | 1          | 1      |
| 2          | 4      | 3     | 1    | 0   | 0          | 0          | 0          | 0      |
| 2          | 3      | 3     | 0    | 0   | 0          | 0          | 1          | 1      |
| 1          | 4      | 3     | 1    | 0   | 0          | 0          | 0          | 0      |
| 2          | 4      | 3     | 0    | 0   | 0          | 0          | 0          | 1      |
| 2          | 4      | 3     | 1    | 0   | 0          | 0          | 0          | 0      |
| 2          | 4      | 2     | 0    | 0   | 0          | 0          | 0          | 1      |
| 3          | 4      | 3     | 0    | 0   | 0          | 1          | 0          | 0      |
| 2          | 4      | 3     | 0    | 0   | 0          | 0          | 0          | 1      |

|   |   |   |   |   |   |   |   |   |
|---|---|---|---|---|---|---|---|---|
| 2 | 4 | 3 | 0 | 0 | 0 | 1 | 0 | 0 |
| 2 | 4 | 3 | 1 | 0 | 0 | 0 | 0 | 0 |
| 3 | 4 | 2 | 0 | 0 | 0 | 1 | 0 | 1 |
| 2 | 4 | 3 | 0 | 1 | 1 | 1 | 0 | 0 |
| 1 | 4 | 3 | 0 | 0 | 0 | 0 | 0 | 1 |
| 2 | 4 | 2 | 0 | 0 | 0 | 0 | 0 | 1 |
| 3 | 3 | 3 | 0 | 0 | 0 | 1 | 1 | 1 |
| 1 | 4 | 2 | 1 | 0 | 0 | 0 | 0 | 0 |
| 2 | 4 | 3 | 1 | 0 | 0 | 0 | 0 | 0 |
| 2 | 4 | 2 | 1 | 0 | 0 | 0 | 0 | 0 |
| 2 | 4 | 3 | 1 | 0 | 0 | 0 | 0 | 0 |
| 1 | 4 | 2 | 1 | 0 | 0 | 0 | 0 | 0 |
| 2 | 3 | 3 | 0 | 0 | 0 | 0 | 0 | 1 |
| 2 | 4 | 3 | 1 | 0 | 0 | 0 | 0 | 0 |
| 2 | 3 | 3 | 0 | 0 | 0 | 1 | 1 | 1 |
| 3 | 4 | 3 | 0 | 0 | 0 | 0 | 1 | 1 |
| 3 | 4 | 3 | 1 | 0 | 0 | 0 | 0 | 0 |
| 2 | 4 | 3 | 0 | 1 | 0 | 0 | 0 | 0 |
| 1 | 4 | 3 | 1 | 0 | 0 | 0 | 0 | 0 |
| 2 | 4 | 3 | 1 | 0 | 0 | 0 | 0 | 0 |
| 2 | 4 | 3 | 1 | 0 | 0 | 0 | 0 | 0 |
| 2 | 4 | 3 | 1 | 0 | 0 | 0 | 0 | 0 |
| 2 | 4 | 2 | 0 | 0 | 1 | 1 | 0 | 0 |
| 2 | 4 | 3 | 1 | 0 | 0 | 0 | 0 | 0 |
| 1 | 4 | 3 | 1 | 0 | 0 | 0 | 0 | 0 |
| 3 | 4 | 2 | 1 | 0 | 0 | 0 | 0 | 0 |
| 2 | 4 | 2 | 1 | 0 | 0 | 0 | 0 | 0 |
| 2 | 4 | 3 | 1 | 0 | 0 | 0 | 0 | 0 |
| 2 | 4 | 2 | 1 | 0 | 0 | 0 | 0 | 0 |
| 1 | 4 | 2 | 1 | 0 | 0 | 0 | 0 | 0 |
| 2 | 4 | 1 | 1 | 0 | 0 | 0 | 0 | 0 |
| 3 | 4 | 2 | 0 | 0 | 0 | 1 | 0 | 0 |
| 1 | 4 | 3 | 1 | 0 | 0 | 0 | 0 | 0 |
| 2 | 4 | 3 | 1 | 0 | 0 | 0 | 0 | 0 |
| 3 | 4 | 3 | 0 | 1 | 0 | 0 | 0 | 0 |
| 1 | 4 | 1 | 1 | 0 | 0 | 0 | 0 | 0 |
| 2 | 3 | 3 | 0 | 0 | 0 | 0 | 0 | 1 |
| 3 | 4 | 3 | 0 | 0 | 0 | 0 | 0 | 1 |
| 1 | 4 | 2 | 1 | 0 | 0 | 0 | 0 | 0 |
| 3 | 4 | 3 | 0 | 0 | 0 | 1 | 0 | 1 |
| 1 | 4 | 3 | 1 | 0 | 0 | 0 | 0 | 0 |
| 2 | 4 | 3 | 1 | 0 | 0 | 0 | 0 | 0 |
| 3 | 4 | 3 | 0 | 0 | 0 | 0 | 1 | 0 |
| 2 | 4 | 3 | 0 | 0 | 0 | 0 | 0 | 1 |
| 1 | 4 | 3 | 1 | 0 | 0 | 0 | 0 | 0 |
| 3 | 4 | 3 | 0 | 0 | 0 | 1 | 0 | 0 |
| 3 | 4 | 3 | 1 | 0 | 0 | 0 | 0 | 0 |

|   |   |   |   |   |   |   |   |   |
|---|---|---|---|---|---|---|---|---|
| 2 | 3 | 3 | 0 | 0 | 0 | 0 | 0 | 1 |
| 2 | 4 | 3 | 0 | 0 | 0 | 1 | 0 | 0 |
| 3 | 3 | 2 | 0 | 0 | 0 | 0 | 0 | 1 |
| 2 | 4 | 2 | 1 | 0 | 0 | 0 | 0 | 0 |
| 2 | 4 | 3 | 1 | 0 | 0 | 0 | 0 | 0 |
| 1 | 4 | 3 | 1 | 0 | 0 | 0 | 0 | 0 |
| 2 | 4 | 3 | 0 | 0 | 0 | 0 | 0 | 1 |
| 3 | 4 | 3 | 1 | 0 | 0 | 0 | 0 | 0 |
| 2 | 4 | 3 | 1 | 0 | 0 | 0 | 0 | 0 |
| 2 | 4 | 3 | 0 | 0 | 0 | 1 | 1 | 1 |
| 1 | 4 | 3 | 1 | 0 | 0 | 0 | 0 | 0 |
| 1 | 4 | 2 | 1 | 0 | 0 | 0 | 0 | 0 |
| 1 | 3 | 3 | 0 | 0 | 0 | 1 | 0 | 0 |
| 2 | 4 | 1 | 0 | 0 | 0 | 1 | 0 | 0 |
| 1 | 3 | 3 | 1 | 0 | 0 | 0 | 0 | 0 |
| 2 | 4 | 3 | 0 | 0 | 0 | 0 | 0 | 1 |
| 2 | 4 | 3 | 1 | 0 | 0 | 0 | 0 | 0 |
| 2 | 4 | 3 | 1 | 0 | 0 | 0 | 0 | 0 |
| 1 | 4 | 3 | 1 | 0 | 0 | 0 | 0 | 0 |
| 2 | 4 | 3 | 0 | 0 | 0 | 1 | 0 | 1 |
| 2 | 4 | 2 | 1 | 0 | 0 | 0 | 0 | 0 |
| 2 | 4 | 3 | 1 | 0 | 0 | 0 | 0 | 0 |
| 2 | 4 | 3 | 1 | 0 | 0 | 0 | 0 | 0 |
| 2 | 4 | 2 | 0 | 0 | 0 | 1 | 0 | 0 |
| 2 | 4 | 3 | 0 | 0 | 0 | 1 | 0 | 0 |
| 1 | 4 | 2 | 1 | 0 | 0 | 0 | 0 | 0 |
| 2 | 4 | 2 | 1 | 0 | 0 | 0 | 0 | 0 |
| 3 | 4 | 2 | 0 | 0 | 0 | 1 | 0 | 0 |
| 2 | 4 | 1 | 1 | 0 | 0 | 0 | 0 | 0 |
| 2 | 4 | 3 | 1 | 0 | 0 | 0 | 0 | 0 |
| 2 | 4 | 3 | 0 | 0 | 0 | 0 | 0 | 1 |
| 2 | 4 | 3 | 1 | 0 | 0 | 0 | 0 | 0 |
| 2 | 4 | 3 | 1 | 0 | 0 | 0 | 0 | 0 |
| 2 | 4 | 3 | 1 | 0 | 0 | 0 | 0 | 0 |
| 1 | 3 | 2 | 1 | 0 | 0 | 0 | 0 | 0 |
| 3 | 4 |   | 0 | 1 | 1 | 0 | 0 | 0 |
| 2 | 3 | 3 | 0 | 0 | 0 | 0 | 0 | 1 |
| 1 | 4 | 3 | 1 | 0 | 0 | 0 | 0 | 0 |
| 2 | 4 | 3 | 1 | 0 | 0 | 0 | 0 | 0 |
| 3 | 4 | 3 | 1 | 0 | 0 | 0 | 0 | 0 |
| 1 | 4 | 2 | 1 | 0 | 0 | 0 | 0 | 0 |
| 2 | 3 | 3 | 0 | 0 | 0 | 0 | 1 | 0 |
| 2 | 3 | 2 | 1 | 0 | 0 | 0 | 0 | 0 |
| 1 | 4 | 2 | 1 | 0 | 0 | 0 | 0 | 0 |
| 2 | 4 | 3 | 0 | 0 | 0 | 1 | 1 | 0 |
| 1 | 4 | 1 | 1 | 0 | 0 | 0 | 0 | 0 |
| 2 | 4 | 3 | 1 | 0 | 0 | 0 | 0 | 0 |

|   |   |   |   |   |   |   |   |   |
|---|---|---|---|---|---|---|---|---|
| 2 | 4 | 2 | 0 | 0 | 0 | 1 | 0 | 1 |
| 2 | 4 | 2 | 1 | 0 | 0 | 0 | 0 | 0 |
| 2 | 4 | 3 | 0 | 0 | 0 | 1 | 0 | 0 |
| 2 | 4 | 2 | 1 | 0 | 0 | 0 | 0 | 0 |
| 3 | 4 | 1 | 1 | 0 | 0 | 0 | 0 | 0 |
| 1 | 4 | 2 | 1 | 0 | 0 | 0 | 0 | 0 |
| 2 | 4 | 3 | 0 | 0 | 1 | 0 | 0 | 0 |
| 1 | 3 | 3 | 1 | 0 | 0 | 0 | 0 | 0 |
| 1 | 4 | 3 | 1 | 0 | 0 | 0 | 0 | 0 |
| 3 | 4 | 3 | 1 | 0 | 0 | 0 | 0 | 0 |
| 2 | 4 | 2 | 1 | 0 | 0 | 0 | 0 | 0 |
| 1 | 4 | 3 | 1 | 0 | 0 | 0 | 0 | 0 |
| 2 | 4 | 2 | 0 | 0 | 0 | 1 | 0 | 0 |
| 2 | 4 | 3 | 1 | 0 | 0 | 0 | 0 | 0 |
| 2 | 4 | 2 | 0 | 0 | 0 | 1 | 0 | 0 |
| 1 | 4 | 3 | 0 | 0 | 0 | 0 | 1 | 1 |
| 2 | 4 | 2 | 1 | 0 | 0 | 0 | 0 | 0 |
| 1 | 4 | 3 | 1 | 0 | 0 | 0 | 0 | 0 |
| 1 | 4 | 3 | 1 | 0 | 0 | 0 | 0 | 0 |
| 2 | 4 | 2 | 1 | 0 | 0 | 0 | 0 | 0 |
| 1 | 4 | 3 | 1 | 0 | 0 | 0 | 0 | 0 |
| 2 | 4 | 3 | 1 | 0 | 0 | 0 | 0 | 0 |
| 2 | 4 | 2 | 0 | 0 | 1 | 0 | 0 | 0 |
| 2 | 4 | 2 | 1 | 0 | 0 | 0 | 0 | 0 |
| 2 | 4 | 3 | 1 | 0 | 0 | 0 | 0 | 0 |
| 3 | 4 | 2 | 0 | 0 | 0 | 0 | 1 | 0 |
| 1 | 4 | 2 | 0 | 1 | 0 | 0 | 0 | 0 |
| 3 | 4 | 1 | 1 | 0 | 0 | 0 | 0 | 0 |
| 1 | 4 | 1 | 0 | 0 | 0 | 1 | 0 | 0 |
| 3 | 4 | 2 | 0 | 0 | 0 | 1 | 0 | 0 |
| 1 | 3 | 2 | 1 | 0 | 0 | 0 | 0 | 0 |
| 2 | 4 | 3 | 1 | 0 | 0 | 0 | 0 | 0 |
| 1 | 4 | 2 | 0 | 0 | 0 | 1 | 0 | 0 |
| 1 | 4 | 3 | 1 | 0 | 0 | 0 | 0 | 0 |
| 3 | 4 | 3 | 0 | 0 | 0 | 1 | 0 | 0 |
| 2 | 4 |   | 1 | 0 | 0 | 0 | 0 | 0 |
